# Supplementary material
Source: HighWire-hosted journal article supplement (https://jcptest-stage.highwire.org/highwire/filestream/200065/field_highwire_adjunct_files/0/jcp-2024-209418supp001_data_supplement.pdf)
Supplement: jcp-2024-209418supp001_data_supplement.pdf [file jcp-2024-209418supp001_data_supplement.pdf]

**Supplementary Figure 1:** Results of the quality assurance test for point of care visualization chain in pathology as evaluated on (a) pathology-dedicated medical monitor, (b) "standard" commercial monitor and (c) high-resolution commercial monitor. COTS, consumer-off-the-shelf; PG, professional grade; MG, medical grade. QA test can be found here: <https://www.virtualpathology.leeds.ac.uk/research/systems/pouqa/pathology/>

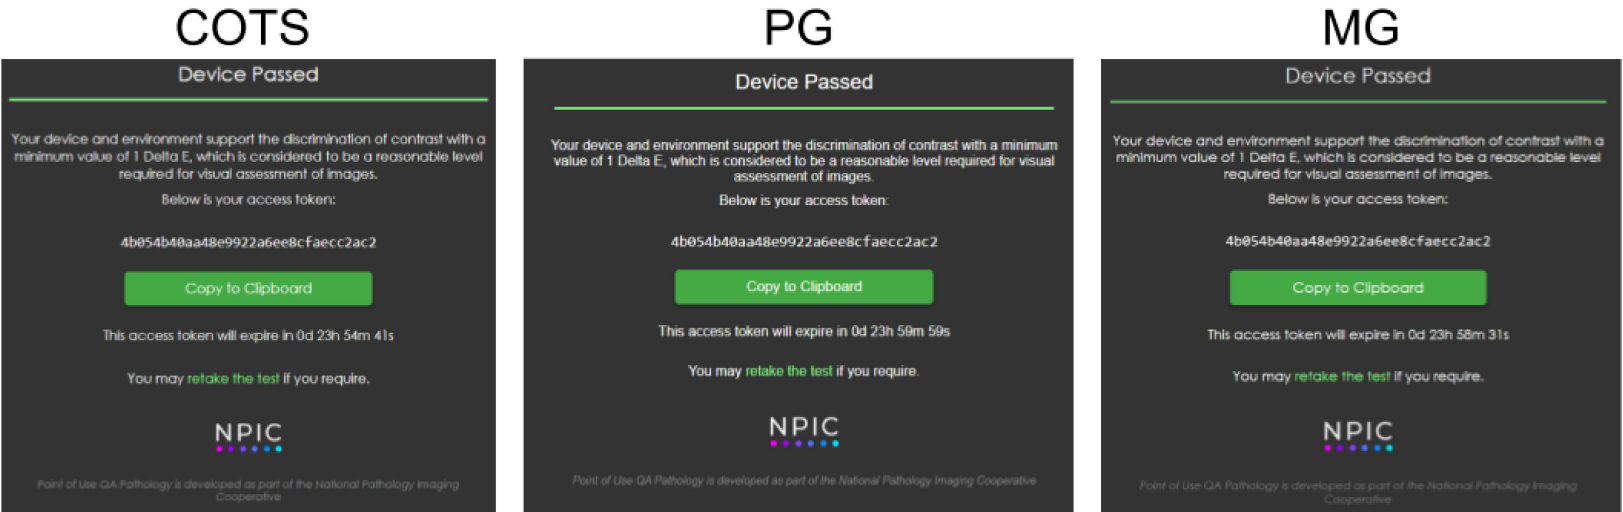

**Supplementary Table 1:** Example of spreadsheet used for the renal pathology review of cases for the validation of the scanning/visualization chain.

|         |    | LIGHT MICROSCOPY |              |             |           |            |        |          | IF (0-3) |     |     |    |     |   |   |        |        |      |   |   |   |   |   |    |    |
|---------|----|------------------|--------------|-------------|-----------|------------|--------|----------|----------|-----|-----|----|-----|---|---|--------|--------|------|---|---|---|---|---|----|----|
| Scanner | ID | N glom           | N glob scler | N seg scler | N endocap | N crescent | % IFTA | AS (0-3) | IgG      | IgA | IgM | C3 | C1q | k | λ | 1st Dx | 2nd Dx | Desc | M | E | S | T | C | AI | CI |

IF, immunofluorescence; ID, identifier; N glom, total number of glomeruli; N glob scler, number of globally sclerosed glomeruli; N seg scler, number of segmentally sclerosed glomeruli; N endocap, number of glomeruli with endocapillary hypercellularity; N crescent, number of glomeruli with crescents; IFTA, interstitial fibrosis and tubular atrophy; AS, arteriosclerosis; k, kappa light chain; λ, lambda light chain; 1st Dx, primary diagnosis; 2nd Dx, secondary diagnosis; Desc, additional descriptor; Oxford Classification derived scores for IgA nephropathy cases: M, mesangial hypercellularity; E, endocapillary hypercellularity; S, segmental sclerosis; T, tubular atrophy score; C, crescents; AI, activity index in lupus nephritis; CI, chronicity index in lupus nephritis.
